# Supplementary material for: Metabolic Analysis of Four Cultivars of Liriope platyphylla
Source: MDPI journal article supplement (doi:10.3390/metabo9030059), 2019-03-26
Supplement: s1 [file s1]

**Table S2.** Metabolites identified in GC-TOFMS chromatograms of *Liriope platyphylla*.

| №  | Compound              | RT <sup>1)</sup> | RRT <sup>2)</sup> | Mass fragment <sup>3)</sup> | Quantification <sup>4)</sup> |
|----|-----------------------|------------------|-------------------|-----------------------------|------------------------------|
| 1  | Pyruvic acid          | 4.54             | 0.426             | 115, <b>174</b> , 189       | 174                          |
| 2  | Lactic acid           | 4.63             | 0.434             | 117, <b>147</b> , 191       | 147                          |
| 3  | Alanine               | 5.13             | 0.481             | <b>116</b> , 147, 190       | 116                          |
| 4  | Glycolic acid         | 6.23             | 0.584             | <b>147</b> , 177, 205       | 147                          |
| 5  | Valine                | 6.34             | 0.595             | <b>144</b> , 156, 218       | 144                          |
| 6  | Serine                | 6.79             | 0.636             | <b>116</b> , 132, 147       | 116                          |
| 7  | Ethanolamine          | 6.86             | 0.643             | 100, 147, <b>174</b>        | 174                          |
| 8  | Glycerol              | 6.89             | 0.646             | 103, 117, <b>147</b>        | 147                          |
| 9  | Leucine               | 6.90             | 0.647             | 102, 147, <b>158</b>        | 158                          |
| 10 | Isoleucine            | 7.12             | 0.667             | 147, <b>158</b> , 218       | 158                          |
| 11 | Proline               | 7.20             | 0.675             | <b>142</b> , 158, 216       | 142                          |
| 12 | Nicotinic acid        | 7.24             | 0.678             | 106, 136, <b>180</b>        | 180                          |
| 13 | Glycine               | 7.26             | 0.680             | 147, <b>174</b> , 248       | 174                          |
| 14 | Succinic acid         | 7.33             | 0.687             | 129, <b>147</b> , 247       | 147                          |
| 15 | Glyceric acid         | 7.43             | 0.697             | 133, <b>147</b> , 189       | 147                          |
| 16 | Fumaric acid          | 7.67             | 0.719             | 143, 147, <b>245</b>        | 245                          |
| 17 | Threonine             | 7.95             | 0.746             | 101, 117, <b>219</b>        | 219                          |
| 18 | β-alanine             | 8.37             | 0.785             | 147, <b>174</b> , 248       | 174                          |
| 19 | Malic acid            | 8.86             | 0.830             | <b>147</b> , 233, 245       | 147                          |
| 20 | Aspartic acid         | 9.13             | 0.856             | <b>100</b> , 147, 232       | 100                          |
| 21 | Pyroglutamic acid     | 9.24             | 0.866             | 147, <b>156</b> , 230       | 156                          |
| 22 | 4-Aminobutyric acid   | 9.25             | 0.868             | 147, <b>174</b> , 304       | 174                          |
| 23 | Threonic acid         | 9.40             | 0.882             | <b>147</b> , 205, 220       | 147                          |
| 24 | Arginine              | 9.90             | 0.928             | <b>142</b> , 147, 162       | 142                          |
| 25 | Glutamic acid         | 9.93             | 0.931             | 128, 156, <b>246</b>        | 246                          |
| 26 | Phenylalanine         | 10.06            | 0.943             | 100, 192, <b>218</b>        | 218                          |
| 27 | p-Hydroxybenzoic acid | 10.07            | 0.944             | 193, <b>223</b> , 267       | 223                          |
| 28 | Xylose                | 10.14            | 0.951             | <b>103</b> , 147, 217       | 103                          |
| 29 | Asparagine            | 10.34            | 0.969             | <b>116</b> , 132, 231       | 116                          |
| IS | Ribitol               | 10.67            | 1.000             | 103, 147, <b>217</b>        | 217                          |
| 30 | Vanillic acid         | 11.09            | 1.040             | 223, 267, <b>297</b>        | 297                          |
| 31 | Glutamine             | 11.11            | 1.042             | 147, <b>156</b> , 245       | 156                          |
| 32 | Shikimic acid         | 11.29            | 1.059             | 147, <b>204</b> , 255       | 204                          |
| 33 | Citric acid           | 11.39            | 1.068             | 147, <b>273</b> , 347       | 273                          |
| 34 | Quinic acid           | 11.63            | 1.090             | <b>147</b> , 255, 345       | 345                          |
| 35 | Fructose              | 11.72            | 1.098             | <b>103</b> , 147, 217       | 103                          |
| 36 | Galactose             | 11.85            | 1.111             | <b>147</b> , 205, 319       | 147                          |
| 37 | Glucose               | 11.89            | 1.115             | <b>147</b> , 160, 205       | 147                          |
| 38 | Mannose               | 12.03            | 1.128             | <b>147</b> , 205, 319       | 147                          |
| 39 | Mannitol              | 12.15            | 1.139             | <b>147</b> , 217, 319       | 319                          |
| 40 | p-Coumaric acid       | 12.33            | 1.156             | <b>219</b> , 249, 293       | 219                          |
| 41 | Inositol              | 13.18            | 1.236             | 147, 217, <b>305</b>        | 305                          |
| 42 | Ferulic acid          | 13.30            | 1.247             | 308, 323, <b>338</b>        | 338                          |
| 43 | Tryptophan            | 14.03            | 1.315             | <b>202</b> , 219, 348       | 202                          |
| 44 | Sinapic acid          | 14.19            | 1.331             | <b>338</b> , 353, 368       | 338                          |
| 45 | Sucrose               | 16.12            | 1.512             | 147, <b>217</b> , 361       | 217                          |
| 46 | Trehalose             | 16.66            | 1.562             | 147, <b>191</b> , 361       | 191                          |
| 47 | Raffinose             | 19.78            | 1.854             | 204, <b>217</b> , 361       | 217                          |

<sup>1)</sup> Retention time (min). <sup>2)</sup> Relative retention time (retention time of the analyte/retention time of the IS). <sup>3)</sup> Lists of first three ions with the highest intensity. Ions in bold indicate the most intense product ion <sup>4)</sup> Specific mass ion used for quantification.
